# Supplementary material for: Trinucleotide Repeat Expansion in the Transcription Factor 4 (TCF4) Gene Leads to Widespread mRNA Splicing Changes in Fuchs' Endothelial Corneal Dystrophy
Source: PubMed Central journal article supplement — Invest Ophthalmol Vis Sci. 2017 Jan;58(1):343–52. doi: 10.1167/iovs.16-20900 (PMC5270622; doi:10.1167/iovs.16-20900), 2017-01
Supplement: iovs-57-15-49_s01.pdf [file iovs-57-15-49_s01.pdf]

Supplementary Table 1. PCR primers and amplification conditions for RT-PCR validation.

| Gene   | Forward Primer               | Reverse Primer               | PCR Conditions                                                                    |
|--------|------------------------------|------------------------------|-----------------------------------------------------------------------------------|
| NUMA1  | TGCAGCGAGAAGCACAGAGCAC       | CCTGCTCCTTCTGGCTCAACTG       | 95°C- 6 min-1X; (95°C-1 min; 68°C-3 min)-40X; 68°C-10 min-1X; 4°C-Hold            |
| PPF1B  | GCAATCTGAAGAAAGAGACATC       | ATGTCATCTGGGTGAATGTAG        | 95°C- 6 min-1X; (95°C-1 min; 62°C-1 min; 68°C-2 min)-40X; 68°C-7 min-1X; 4°C-Hold |
| MBNL2  | ACAGCACCATGATCGACACAAG       | AGATTCTTGGCATTCCATTCCG       | 95°C- 6 min-1X; (95°C-1 min; 64°C-1 min; 68°C-2 min)-40X; 68°C-7 min-1X; 4°C-Hold |
| VEGFA  | CCATGAACTTTCTGCTGTCTT        | TCGATCGTTCTGTATCAGTCT        | 95°C- 6 min-1X; (95°C-1 min; 60°C-1 min; 68°C-2 min)-40X; 68°C-7 min-1X; 4°C-Hold |
| SYNE1  | CACAGCCTTCTCCAATCTC          | AGTTTGTGCTCCAGTCTCTTC        | 95°C- 6 min-1X; (95°C-1 min; 60°C-1 min; 68°C-2 min)-40X; 68°C-7 min-1X; 4°C-Hold |
| ITGA6  | TGTTTCCCTCAAAGACTGTAGC       | TTGATCTCTCGCTCTTCTTTCC       | 95°C- 6 min-1X; (95°C-1 min; 62°C-1 min; 68°C-2 min)-40X; 68°C-7 min-1X; 4°C-Hold |
| FN1    | ATAGAATTACCACAACCCCTAC       | TGACAACTCTGCAACATCTTCC       | 95°C- 6 min-1X; (95°C-1 min; 62°C-1 min; 68°C-2 min)-40X; 68°C-7 min-1X; 4°C-Hold |
| SORBS1 | CCAGCTGATTACTTGGAATCCACGGAAG | GTTCTCCTTCATACCAGTTCTGATCAAT | 95°C- 6 min-1X; (95°C-1 min; 50°C-1 min; 68°C-2 min)-40X; 68°C-7 min-1X; 4°C-Hold |
| CD47   | ATTAACCTCCTTCGTCATTGCC       | CTAACAATCACGTAAGGGTCTC       | 95°C- 6 min-1X; (95°C-1 min; 60°C-1 min; 68°C-2 min)-40X; 68°C-7 min-1X; 4°C-Hold |
| CLASP1 | CAGTTAGTACCAAATCTGTGTC       | CTATTCGGTTTGGACTTGTTTC       | 95°C- 6 min-1X; (95°C-1 min; 62°C-1 min; 68°C-2 min)-40X; 68°C-7 min-1X; 4°C-Hold |
