# Supplementary material for: Trinucleotide Repeat Expansion in the Transcription Factor 4 (TCF4) Gene Leads to Widespread mRNA Splicing Changes in Fuchs' Endothelial Corneal Dystrophy
Source: PubMed Central journal article supplement — Invest Ophthalmol Vis Sci. 2017 Jan;58(1):343–52. doi: 10.1167/iovs.16-20900 (PMC5270622; doi:10.1167/iovs.16-20900), 2017-01
Supplement: iovs-57-15-49_s02.pdf [file iovs-57-15-49_s02.pdf]

Supplementary Table 2. Complete gene list from pilot and validation data sets.

Criteria Met in Pairwise Comparisons

| Gene    | Event                                                                               | Pilot | Pilot % | Validation | Validation % | Total | Average % |
|---------|-------------------------------------------------------------------------------------|-------|---------|------------|--------------|-------|-----------|
| NUMA1   | chr11:71723941:71727306:-@chr11:71723447:71723488:-@chr11:71721832:71721900:-       | 12    | 100%    | 44         | 100%         | 56    | 100%      |
| PPFIBP1 | chr12:27829361:27829532:+@chr12:27829997:27830029:+@chr12:27832422:27832572:+       | 12    | 100%    | 44         | 100%         | 56    | 100%      |
| SYNE1   | chr6:152469180:152469513:-@chr6:152466622:152466690:-@chr6:152464758:152464900:-    | 12    | 100%    | 43         | 98%          | 55    | 99%       |
| MBNL1   | chr3:152163071:152163328:+@chr3:152164493:152164546:+@chr3:152165409:152165562:+    | 11    | 92%     | 44         | 100%         | 55    | 96%       |
| ITGA6   | chr2:173362703:173362828:+@chr2:173366500:173366629:+@chr2:173368819:173371181:+    | 12    | 100%    | 37         | 84%          | 49    | 92%       |
| BZRAP1  | chr17:56387328:56387519:-@chr17:56385902:56386741:-@chr17:56385203:56385302:-       | 12    | 100%    | 36         | 82%          | 48    | 91%       |
| FGFR1   | chr8:38314874:38315052:-@chr8:38287200:38287466:-@chr8:38285864:38285953:-          | 12    | 100%    | 36         | 82%          | 48    | 91%       |
| EXOC1   | chr4:56749989:56750094:+@chr4:56755054:56755098:+@chr4:56756389:56756552:+          | 12    | 100%    | 34         | 77%          | 46    | 89%       |
| MBNL2   | chr13:97999058:97999321:+@chr13:98009050:98009103:+@chr13:98009736:98009889:+       | 9     | 75%     | 44         | 100%         | 53    | 88%       |
| ADD3    | chr10:111890121:111890244:+@chr10:111892063:111892158:+@chr10:111893084:111895323:+ | 9     | 75%     | 43         | 98%          | 52    | 86%       |
| INF2    | chr14:105180540:105181193:+@chr14:105181621:105181677:+@chr14:105185132:105185947:+ | 12    | 100%    | 32         | 73%          | 44    | 86%       |
| KIF13A  | chr6:17794480:17794626:-@chr6:17790103:17790141:-@chr6:17788007:17788106:-          | 10    | 83%     | 33         | 75%          | 43    | 79%       |
| SCARB1  | chr12:125270903:125271049:-@chr12:125267229:125267357:-@chr12:125262174:125263132:- | 12    | 100%    | 25         | 57%          | 37    | 78%       |
| CD46    | chr1:207958964:207959027:+@chr1:207963598:207963690:+@chr1:207966864:207968861:+    | 11    | 92%     | 27         | 61%          | 38    | 77%       |
| PLEKHM2 | chr1:16046229:16046415:+@chr1:16047824:16047883:+@chr1:16051812:16052040:+          | 9     | 75%     | 33         | 75%          | 42    | 75%       |
| VEGFA   | chr6:43746626:43746655:+@chr6:43749693:43749824:+@chr6:43752278:43754223:+          | 9     | 75%     | 32         | 73%          | 41    | 74%       |
| GOLGA2  | chr9:131036129:131036251:-@chr9:131035064:131035144:-@chr9:131030699:131030803:-    | 7     | 58%     | 39         | 89%          | 46    | 73%       |
| CLASP1  | chr2:122204913:122205083:-@chr2:122203025:122203072:-@chr2:122187649:122187753:-    | 9     | 75%     | 31         | 70%          | 40    | 73%       |
| NHSL1   | chr6:138768138:138768330:-@chr6:138763120:138763251:-@chr6:138751530:138754817:-    | 9     | 75%     | 31         | 70%          | 40    | 73%       |

|          |                                                                                         |    |      |    |     |    |     |
|----------|-----------------------------------------------------------------------------------------|----|------|----|-----|----|-----|
| ARVCF    | chr22:19959409:19959494:-@chr22:19958739:19958858:-<br>@chr22:19957402:19958266:-       | 12 | 100% | 20 | 45% | 32 | 73% |
| KIF13A   | chr6:17772139:17772290:-@chr6:17771345:17771449:-<br>@chr6:17763924:17765177:-          | 7  | 58%  | 38 | 86% | 45 | 72% |
| HLA-DPA1 | chr6:33048457:33048555:-@chr6:33041248:33041446:-<br>@chr6:33037418:33037663:-          | 11 | 92%  | 21 | 48% | 32 | 70% |
| HLA-DPA1 | chr6:33048457:33048555:-@chr6:33041248:33041549:-<br>@chr6:33037418:33037663:-          | 11 | 92%  | 20 | 45% | 31 | 69% |
| COPZ2    | chr17:46105838:46105876:-@chr17:46105042:46105155:-<br>@chr17:46103533:46103841:-       | 9  | 75%  | 26 | 59% | 35 | 67% |
| KIFC3    | chr16:57793640:57793748:-@chr16:57793037:57793065:-<br>@chr16:57792129:57792821:-       | 12 | 100% | 15 | 34% | 27 | 67% |
| TMEM63B  | chr6:44102754:44102833:+@chr6:44103065:44103103:+@chr6:44104086:44<br>104176:+          | 12 | 100% | 14 | 32% | 26 | 66% |
| AKAP13   | chr15:86198648:86199018:+@chr15:86201768:86201821:+@chr15:86207794<br>:86207986:+       | 7  | 58%  | 30 | 68% | 37 | 63% |
| WNK1     | chr12:987378:987527:+@chr12:989887:990165:+@chr12:990858:990955:+                       | 10 | 83%  | 19 | 43% | 29 | 63% |
| CD46     | chr1:207940358:207940540:+@chr1:207941124:207941168:+@chr1:2079436<br>66:207943707:+    | 9  | 75%  | 22 | 50% | 31 | 63% |
| MYO6     | chr6:76618213:76618344:+@chr6:76621389:76621415:+@chr6:76623780:76<br>623998:+          | 8  | 67%  | 25 | 57% | 33 | 62% |
| SOS1     | chr2:39222264:39222528:-@chr2:39216411:39216455:-<br>@chr2:39214614:39214732:-          | 6  | 50%  | 32 | 73% | 38 | 61% |
| USMG5    | chr10:105156166:105156270:-@chr10:105155503:105155789:-<br>@chr10:105153956:105154151:- | 9  | 75%  | 20 | 45% | 29 | 60% |
| ABI1     | chr10:27065994:27066170:-@chr10:27060004:27060018:-<br>@chr10:27059174:27059274:-       | 7  | 58%  | 27 | 61% | 34 | 60% |
| CSDA     | chr12:10865810:10865932:-@chr12:10862507:10862713:-<br>@chr12:10856650:10856747:-       | 12 | 100% | 8  | 18% | 20 | 59% |
| NMRK1    | chr9:77684811:77684958:-@chr9:77684658:77684729:-<br>@chr9:77683912:77684018:-          | 9  | 75%  | 18 | 41% | 27 | 58% |
| DCAF6    | chr1:167973771:167974031:+@chr1:167985019:167985189:+@chr1:1679922<br>26:167992285:+    | 12 | 100% | 6  | 14% | 18 | 57% |
| LRRFIP2  | chr3:37136283:37136399:-@chr3:37132958:37133029:-<br>@chr3:37125127:37125297:-          | 6  | 50%  | 26 | 59% | 32 | 55% |
| SMN1     | chr5:70241893:70242003:+@chr5:70247768:70247821:+@chr5:70248266:70<br>248842:+          | 7  | 58%  | 22 | 50% | 29 | 54% |
| SMN2     | chr5:69366468:69366578:+@chr5:69372348:69372401:+@chr5:69372846:69<br>373422:+          | 7  | 58%  | 22 | 50% | 29 | 54% |
| ARID4B   | chr1:235383108:235383283:-@chr1:235377084:235377341:-<br>@chr1:235359346:235359430:-    | 8  | 67%  | 18 | 41% | 26 | 54% |
| USMG5    | chr10:105155503:105155789:-@chr10:105153956:105154151:-<br>@chr10:105152128:105152223:- | 7  | 58%  | 21 | 48% | 28 | 53% |

|           |                                                                                     |    |      |    |     |    |     |
|-----------|-------------------------------------------------------------------------------------|----|------|----|-----|----|-----|
| ARHGEF40  | chr14:21555160:21555264:+@chr14:21555479:21555622:+@chr14:21556127:21556257:+       | 10 | 83%  | 10 | 23% | 20 | 53% |
| FBXO38    | chr5:147805085:147805264:+@chr5:147806776:147807510:+@chr5:147812987:147813087:+    | 6  | 50%  | 24 | 55% | 30 | 52% |
| NF2       | chr22:30077428:30077590:+@chr22:30079009:30079053:+@chr22:30090741:30094589:+       | 9  | 75%  | 13 | 30% | 22 | 52% |
| MAP4K4    | chr2:102483674:102483771:+@chr2:102484491:102484499:+@chr2:102486084:102486259:+    | 5  | 42%  | 27 | 61% | 32 | 52% |
| NFIX      | chr19:13186349:13186485:+@chr19:13189427:13189549:+@chr19:13192494:13192669:+       | 8  | 67%  | 16 | 36% | 24 | 52% |
| GOLGA4    | chr3:37396592:37396678:+@chr3:37402734:37402796:+@chr3:37407571:37408370:+          | 9  | 75%  | 12 | 27% | 21 | 51% |
| ARHGEF10L | chr1:17958816:17958961:+@chr1:17961043:17961057:+@chr1:17961330:17961511:+          | 9  | 75%  | 11 | 25% | 20 | 50% |
| MAP2K7    | chr19:7968765:7968953:+@chr19:7970693:7970740:+@chr19:7974640:7974781:+             | 12 | 100% | 0  | 0%  | 12 | 50% |
| SSBP3     | chr1:54747111:54747200:-@chr1:54723742:54723822:-@chr1:54722800:54722859:-          | 12 | 100% | 0  | 0%  | 12 | 50% |
| PPHLN1    | chr12:42768665:42768876:+@chr12:42778742:42778798:+@chr12:42781258:42781337:+       | 4  | 33%  | 29 | 66% | 33 | 50% |
| FN1--EDA  | chr2:216246935:216247048:-@chr2:216245534:216245803:-@chr2:216243853:216244040:-    | 4  | 33%  | 28 | 64% | 32 | 48% |
| SPTAN1    | chr9:131371401:131371563:+@chr9:131371930:131371944:+@chr9:131373993:131374124:+    | 10 | 83%  | 5  | 11% | 15 | 47% |
| NDUFV3    | chr21:44317037:44317157:+@chr21:44323292:44324386:+@chr21:44328974:44329773:+       | 3  | 25%  | 30 | 68% | 33 | 47% |
| C21orf62  | chr21:34185902:34186053:-@chr21:34182884:34182964:-@chr21:34162984:34166796:-       | 4  | 33%  | 26 | 59% | 30 | 46% |
| CADM1     | chr11:115080294:115080377:-@chr11:115069126:115069158:-@chr11:115049364:115049495:- | 7  | 58%  | 15 | 34% | 22 | 46% |
| PIFO      | chr1:111889532:111889671:+@chr1:111891138:111891268:+@chr1:111892728:111892845:+    | 8  | 67%  | 11 | 25% | 19 | 46% |
| SLAIN2    | chr4:48385664:48385801:+@chr4:48396593:48396670:+@chr4:48422142:48422460:+          | 4  | 33%  | 25 | 57% | 29 | 45% |
| CADM1     | chr11:115085328:115085500:-@chr11:115069126:115069158:-@chr11:115049364:115049495:- | 7  | 58%  | 14 | 32% | 21 | 45% |
| APBB2     | chr4:40946882:40947087:-@chr4:40937094:40937156:-@chr4:40936631:40936716:-          | 2  | 17%  | 32 | 73% | 34 | 45% |
| SORBS1    | chr10:97181718:97181830:-@chr10:97174251:97174412:-@chr10:97170390:97170534:-       | 9  | 75%  | 6  | 14% | 15 | 44% |
| TCF4      | chr18:53256528:53257045:-@chr18:53254276:53254367:-@chr18:53252511:53252583:-       | 4  | 33%  | 24 | 55% | 28 | 44% |
| AKAP9     | chr7:91669988:91670212:+@chr7:91671360:91671500:+@chr7:91671982:91                  | 8  | 67%  | 8  | 18% | 16 | 42% |

|          |                                                                                      |    |     |    |     |    |     |
|----------|--------------------------------------------------------------------------------------|----|-----|----|-----|----|-----|
|          | 672085:+                                                                             |    |     |    |     |    |     |
| PLD1     | chr3:171405161:171405374:-@chr3:171404475:171404588:-<br>@chr3:171395356:171395484:- | 0  | 0%  | 37 | 84% | 37 | 42% |
| PAMR1    | chr11:35489549:35489656:-@chr11:35473436:35473486:-<br>@chr11:35463029:35463241:-    | 7  | 58% | 11 | 25% | 18 | 42% |
| AGAP3    | chr7:150817074:150817232:+@chr7:150817607:150817832:+@chr7:1508198<br>12:150820725:+ | 10 | 83% | 0  | 0%  | 10 | 42% |
| DOT1L    | chr19:2226182:2227126:+@chr19:2227736:2228381:+@chr19:2229784:2232<br>577:+          | 10 | 83% | 0  | 0%  | 10 | 42% |
| FN1--EDB | chr2:216259251:216259442:-@chr2:216257654:216257926:-<br>@chr2:216256355:216256537:- | 0  | 0%  | 36 | 82% | 36 | 41% |
| IFI44    | chr1:79124997:79125168:+@chr1:79126239:79126376:+@chr1:79128389:79<br>128563:+       | 3  | 25% | 24 | 55% | 27 | 40% |
| PARP2    | chr14:20825210:20825308:+@chr14:20825555:20825679:+@chr14:20825797<br>:20826063:+    | 8  | 67% | 5  | 11% | 13 | 39% |
| SRRM1    | chr1:24989151:24989295:+@chr1:24989674:24989715:+@chr1:24993306:24<br>993416:+       | 8  | 67% | 5  | 11% | 13 | 39% |
| TRIP10   | chr19:6744811:6745005:+@chr19:6746040:6746207:+@chr19:6746463:6746<br>572:+          | 8  | 67% | 5  | 11% | 13 | 39% |
| FBXO38   | chr5:147805085:147805264:+@chr5:147806776:147807285:+@chr5:1478129<br>87:147813087:+ | 3  | 25% | 23 | 52% | 26 | 39% |
| KIAA1109 | chr4:123145653:123145832:+@chr4:123147862:123147990:+@chr4:1231502<br>76:123150395:+ | 1  | 8%  | 30 | 68% | 31 | 38% |
| MICAL3   | chr22:18314620:18314873:-@chr22:18309220:18309282:-<br>@chr22:18305713:18305826:-    | 8  | 67% | 4  | 9%  | 12 | 38% |
| CA13     | chr8:86132845:86133354:+@chr8:86137184:86137524:+@chr8:86142314:86<br>142429:+       | 0  | 0%  | 33 | 75% | 33 | 38% |
| MLLT4    | chr6:168311964:168312169:+@chr6:168314083:168314103:+@chr6:1683148<br>48:168314993:+ | 0  | 0%  | 32 | 73% | 32 | 36% |
| DENND4C  | chr9:19336268:19336412:+@chr9:19336684:19336830:+@chr9:19340990:19<br>341112:+       | 2  | 17% | 24 | 55% | 26 | 36% |
| TCERG1   | chr5:145843114:145843356:+@chr5:145847904:145847966:+@chr5:1458491<br>07:145849307:+ | 1  | 8%  | 27 | 61% | 28 | 35% |
| ARHGAP17 | chr16:24953308:24953464:-@chr16:24950685:24950918:-<br>@chr16:24946791:24946960:-    | 7  | 58% | 5  | 11% | 12 | 35% |
| TTC7A    | chr2:47183978:47184146:+@chr2:47185634:47185691:+@chr2:47202112:47<br>202242:+       | 8  | 67% | 1  | 2%  | 9  | 34% |
| NISCH    | chr3:52514200:52514311:+@chr3:52514895:52515125:+@chr3:52518529:52<br>518653:+       | 1  | 8%  | 26 | 59% | 27 | 34% |
| SUN1     | chr7:882978:883157:+@chr7:889560:889670:+@chr7:891021:891119:+                       | 8  | 67% | 0  | 0%  | 8  | 33% |
| SEPT8    | chr5:132112800:132113067:-@chr5:132109615:132109904:-<br>@chr5:132101101:132101221:- | 0  | 0%  | 29 | 66% | 29 | 33% |
| RAPGEF6  | chr5:130788747:130788870:-@chr5:130785716:130785739:-                                | 0  | 0%  | 29 | 66% | 29 | 33% |

|         |                                                                                         |   |     |    |     |    |     |
|---------|-----------------------------------------------------------------------------------------|---|-----|----|-----|----|-----|
|         | @chr5:130782176:130782396:-                                                             |   |     |    |     |    |     |
| MMAB    | chr12:109999225:109999322:-@chr12:109999048:109999134:-<br>@chr12:109998845:109998909:- | 7 | 58% | 3  | 7%  | 10 | 33% |
| COL6A3  | chr2:238305370:238305490:-@chr2:238303230:238303847:-<br>@chr2:238296225:238296827:-    | 0 | 0%  | 28 | 64% | 28 | 32% |
| IFIT2   | chr10:91043394:91043648:+@chr10:91046627:91046998:+@chr10:91051744:<br>:91051882:+      | 1 | 8%  | 24 | 55% | 25 | 31% |
| C8orf83 | chr8:93966634:93966792:-@chr8:93933731:93933888:-<br>@chr8:93929157:93929238:-          | 0 | 0%  | 27 | 61% | 27 | 31% |
| IFI44L  | chr1:79086088:79086256:+@chr1:79093591:79094078:+@chr1:79094636:79<br>094684:+          | 0 | 0%  | 26 | 59% | 26 | 30% |
| RHOT1   | chr17:30535126:30535328:+@chr17:30538135:30538257:+@chr17:30551635<br>:30552746:+       | 0 | 0%  | 26 | 59% | 26 | 30% |
| SCRIB   | chr8:144890779:144891195:-@chr8:144889722:144889784:-<br>@chr8:144889094:144889183:-    | 7 | 58% | 0  | 0%  | 7  | 29% |
| GABPB2  | chr1:151070328:151070478:+@chr1:151076038:151076151:+@chr1:1510795<br>13:151079698:+    | 0 | 0%  | 25 | 57% | 25 | 28% |
| ZBTB20  | chr3:114107852:114107952:-@chr3:114099624:114099787:-<br>@chr3:114099064:114099251:-    | 0 | 0%  | 25 | 57% | 25 | 28% |
| CDCA7L  | chr7:21956372:21956512:-@chr7:21951235:21951369:-<br>@chr7:21947748:21948125:-          | 0 | 0%  | 24 | 55% | 24 | 27% |
| ERC1    | chr12:1219358:1219513:+@chr12:1221381:1221464:+@chr12:1225032:1225<br>199:+             | 0 | 0%  | 24 | 55% | 24 | 27% |
| ACPL2   | chr3:140978965:140979096:+@chr3:140981085:140981182:+@chr3:1409971<br>84:140997342:+    | 0 | 0%  | 23 | 52% | 23 | 26% |
| C9orf80 | chr9:115456411:115456513:-@chr9:115451807:115451897:-<br>@chr9:115448791:115449913:-    | 0 | 0%  | 23 | 52% | 23 | 26% |
| GLT8D2  | chr12:104443673:104444066:-@chr12:104415135:104415269:-<br>@chr12:104413408:104413454:- | 0 | 0%  | 23 | 52% | 23 | 26% |
| PHF3    | chr6:64345725:64346055:+@chr6:64356524:64356700:+@chr6:64389901:64<br>390062:+          | 0 | 0%  | 23 | 52% | 23 | 26% |
| UBA3    | chr3:69129485:69129524:-@chr3:69129263:69129304:-<br>@chr3:69126949:69127069:-          | 0 | 0%  | 23 | 52% | 23 | 26% |
