# Supplementary material for: Trinucleotide Repeat Expansion in the Transcription Factor 4 (TCF4) Gene Leads to Widespread mRNA Splicing Changes in Fuchs' Endothelial Corneal Dystrophy
Source: PubMed Central journal article supplement — Invest Ophthalmol Vis Sci. 2017 Jan;58(1):343–52. doi: 10.1167/iovs.16-20900 (PMC5270622; doi:10.1167/iovs.16-20900), 2017-01
Supplement: iovs-57-15-49_s03.pdf [file iovs-57-15-49_s03.pdf]

Supplementary Table 3. Web-based PANTHER biochemical pathway analysis of the 101 genes identified in the combined data from the pilot and validation datasets.

| <b><u>GO Molecular function complete</u></b>                       | <b><u>H sapiens (20972)</u></b> | <b><u>Differential splicing FECD (101)</u></b> | <b><u>FECD (expected)</u></b> | <b><u>FECD (fold Enrichment)</u></b> | <b><u>Genes</u></b>                                                                                                                      | <b><u>P-value</u></b> |
|--------------------------------------------------------------------|---------------------------------|------------------------------------------------|-------------------------------|--------------------------------------|------------------------------------------------------------------------------------------------------------------------------------------|-----------------------|
| cell adhesion molecule binding (GO:0050839)                        | 450                             | 15                                             | 2.0                           | 7.4                                  | PPFIBP1, SPTAN1, GOLGA2, FN1, ITGA6, CADM1, SCRIB, NF2, MLLT4, MYO6, ABI1, NISCH, ERC1, CD46, FGFR1                                      | 5.4E-06               |
| cytoskeletal protein binding (GO:0008092)                          | 836                             | 16                                             | 3.8                           | 4.2                                  | MICAL3, KIFC3, SPTAN1, GOLGA2, PLEKHM2, PIFO, KIF13A, NF2, ADD3, SORBS1, SYNE1, MYO6, ABI1, NUMA1, CLASP1, INF2                          | 2.9E-03               |
| GTPase binding (GO:0051020)                                        | 301                             | 10                                             | 1.4                           | 7.3                                  | MICAL3, EXOC1, PIFO, RAPGEF6, CSDA, MLLT4, ERC1, GOLGA4, INF2, AKAP13                                                                    | 3.2E-03               |
| <b><u>GO cellular component complete</u></b>                       |                                 |                                                |                               |                                      |                                                                                                                                          |                       |
| cell-cell adherens junction (GO:0005913)                           | 319                             | 12                                             | 1.5                           | 8.3                                  | KIFC3, PPFIBP1, SPTAN1, GOLGA2, ITGA6, CADM1, SCRIB, SORBS1, MLLT4, MYO6, ABI1, ERC1                                                     | 3.3E-05               |
| adherens junction (GO:0005912) and anchoring junction (GO:0070161) | 680                             | 16                                             | 3.1                           | 5.2                                  | KIFC3, PPFIBP1, SPTAN1, GOLGA2, ITGA6, CADM1, SCRIB, NF2, SORBS1, MLLT4, MYO6, ABI1, ERC1, CLASP1, CD46, DCAF6                           | 9.1E-05               |
| cell cortex (GO:0005938)                                           | 242                             | 9                                              | 1.1                           | 8.2                                  | EXOC1, SPTAN1, NF2, ADD3, MYO6, NUMA1, CLASP1, TRIP10, AKAP13                                                                            | 2.2E-03               |
| Golgi apparatus (GO:0005794)                                       | 1471                            | 19                                             | 6.7                           | 2.9                                  | KIFC3, GLT8D2, GOLGA2, PIFO, ACPL2, KIF13A, SYNE1, MYO6, ERC1, NUMA1, CLASP1, PLD1, GOLGA4, AKAP9, COPZ2, CD46, PPHLN1, TRIP10, HLA-DPA1 | 3.7E-02               |

| <b>GO biological process complete</b>               |     |    |     |     |                                                                                                                         |         |
|-----------------------------------------------------|-----|----|-----|-----|-------------------------------------------------------------------------------------------------------------------------|---------|
| positive regulation of GTPase activity (GO:0043547) | 631 | 15 | 2.9 | 5.3 | SPTAN1, SOS1, ARHGEF10L, ITGA6, SCRIB, RAPGEF6, DENND4C, MLLT4, ARHGAP17, AGAP3, ARHGEF40, AKAP9, TRIP10, FGFR1, AKAP13 | 1.4E-03 |
