# Supplementary material for: Trinucleotide Repeat Expansion in the Transcription Factor 4 (TCF4) Gene Leads to Widespread mRNA Splicing Changes in Fuchs' Endothelial Corneal Dystrophy
Source: PubMed Central journal article supplement — Invest Ophthalmol Vis Sci. 2017 Jan;58(1):343–52. doi: 10.1167/iovs.16-20900 (PMC5270622; doi:10.1167/iovs.16-20900), 2017-01
Supplement: iovs-57-15-49_s04.pdf [file iovs-57-15-49_s04.pdf]

# Supplementary Figure 1

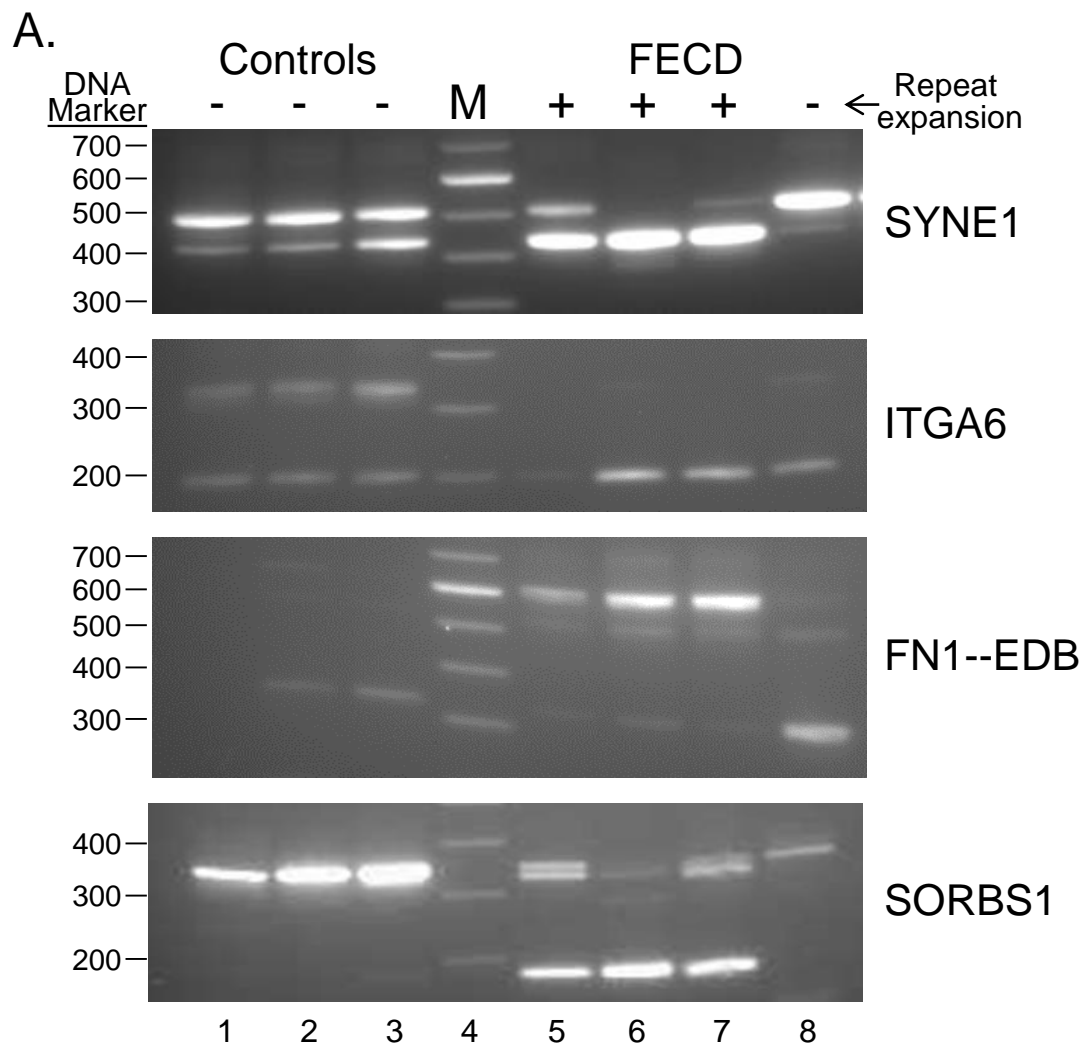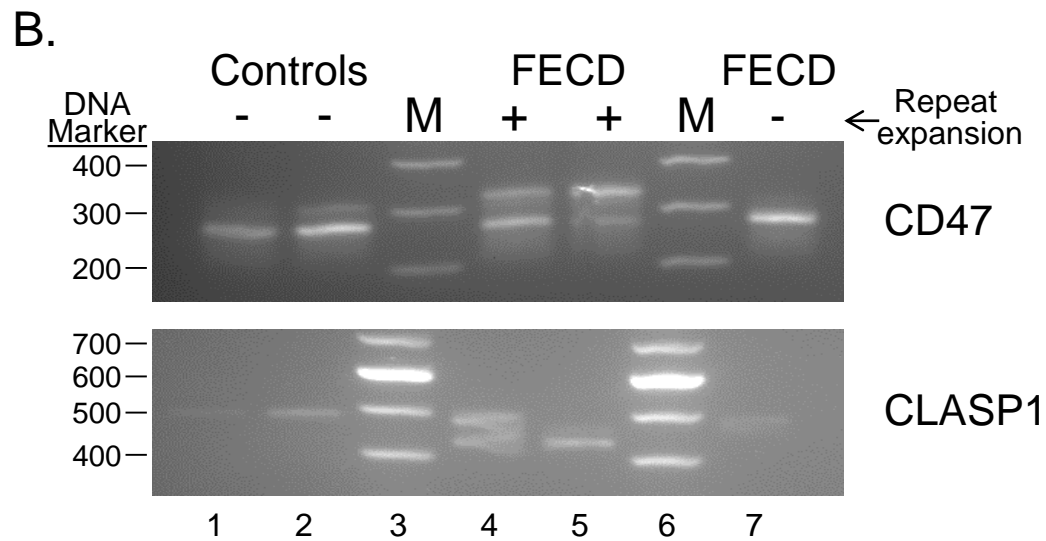

**Supplementary Figure 1. RT-PCR validation of differential splicing events in the CE from FECD patients.** RT-PCR using primers that flank selected exons as listed in Table 2 and Supplementary Table 2 was used to assess exon inclusion from the genes shown in corneal endothelial RNA samples. (A) The repeat expansion status of each control (lanes 1-3) and FECD patient (lanes 5-8) sample is shown (+, >45 repeats; -<45 repeats). Lane 4 contains size markers. (B) The repeat expansion status of each control (lanes 1-2) and FECD patient (lanes 4, 5 and 7) sample is shown (+, >45 repeats; -<45 repeats). Lanes 3 and 6 contain DNA size markers.
